# Supplementary material for: GxxxG Motif Stabilize Ion-Channel like Pores through Cα―H···O Interaction in Aβ (1-40)
Source: MDPI journal article supplement (doi:10.3390/ijms24032192), 2023-01-22
Supplement: s1 [file s1]

## Supporting Information

### **GxxxG motif stabilize ion-channel like pores through C $\alpha$ —H $\cdots$ O interaction in A $\beta$ (1-40)**

Carola Rando<sup>1</sup>, Giuseppe Grasso<sup>1</sup>, Dibakar Sarkar<sup>2</sup>, Michele F.M. Sciacca<sup>3</sup>, Lorena M. Cucci<sup>1</sup>, Alessia Cosentino<sup>1</sup>, Giuseppe Forte<sup>4</sup>, Martina Pannuzzo<sup>5</sup>, Cristina Satriano<sup>1</sup>, Anirbarn Bhunia<sup>2</sup> and Carmelo La Rosa<sup>1,\*</sup>

<sup>1</sup>Dipartimento di Scienze Chimiche, Università degli Studi di Catania, Viale A. Doria 6, 95125 Catania, Italy

<sup>2</sup>Department of Biophysics Bose Institute, Unified Academic Campus, Bidhan Nagar, EN 80, Kolkata 700 091, India

<sup>3</sup>Consiglio Nazionale delle Ricerche, Istituto di Cristallografia, Catania, Italy

<sup>4</sup>Dipartimento di Scienze del Farmaco e della Salute, Università degli Studi di Catania, Viale A. Doria 6, 95125 Catania, Italy

<sup>5</sup>Laboratory of Nanotechnology for Precision Medicine, Fondazione Istituto Italiano di Tecnologia, Via Morego 30, Genoa 16163, Italy

\* Correspondence: Carmelo La Rosa

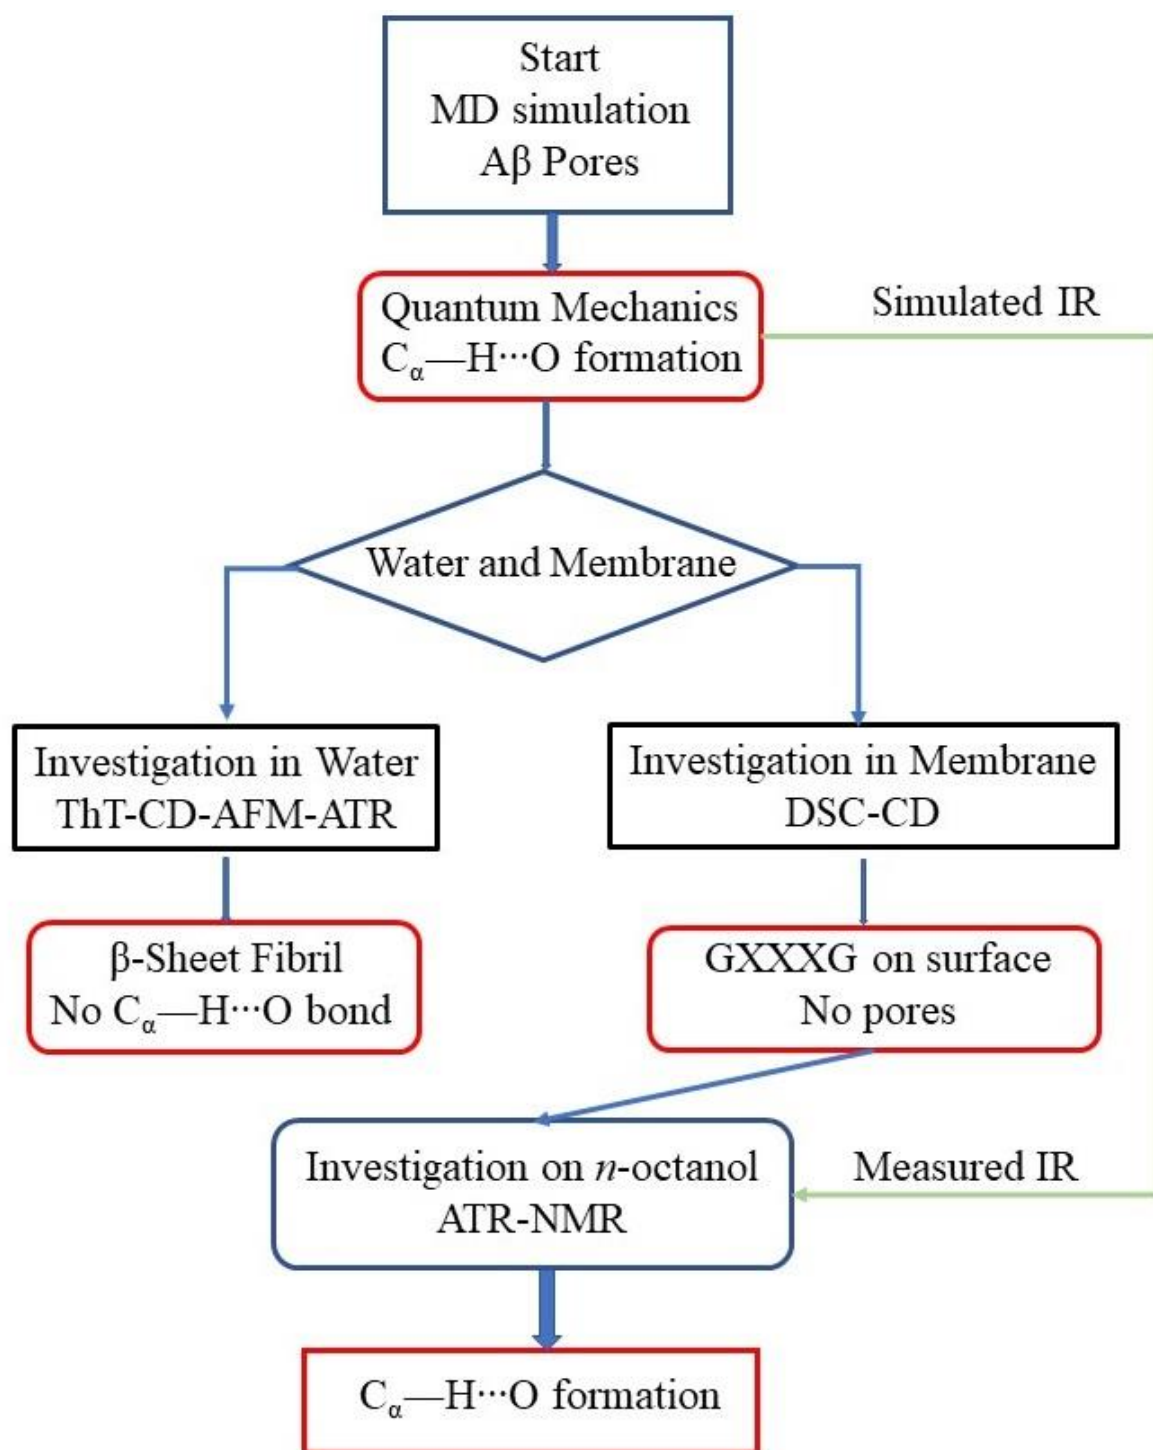

**Figure S1.** Workflow of present work. In red the conclusions.
